## Mapping the H-Y gene

ELIZABETH SIMPSON<sup>1</sup>, PHILLIP CHANDLER<sup>1</sup>, ANNE McLAREN<sup>2</sup>, ELS GOULMY<sup>3</sup>,  
CHRISTINE M. DISTECHE<sup>4</sup>, DAVID C. PAGE<sup>5</sup> and MALCOLM A. FERGUSON-SMITH<sup>6</sup>

<sup>1</sup>Transplantation Biology Section, Clinical Research Centre, Watford Road, Harrow, Middlesex HA1 3UJ, UK

<sup>2</sup>MRC Mammalian Development Unit, Wolfson House, 4 Stephenson Way, London NW1 2HE, UK

<sup>3</sup>Dept Immunohaematology & Blood Bank AZL, University Hospital Leiden, The Netherlands

<sup>4</sup>Dept Pathology, University of Washington, Seattle, Washington 98195, USA

<sup>5</sup>Whitehead Institute, 9 Cambridge Center, Cambridge, Massachusetts 02142, USA

<sup>6</sup>Duncan Guthrie Institute of Medical Genetics, University of Glasgow, Glasgow G3 8SJ, UK

### Summary

This paper uses cytotoxic and proliferative T cell clones specific for H-Y and restricted by MHC molecules to type mice and humans inheriting incomplete portions of the Y chromosome. The data have allowed us to map the H-Y antigen gene *Hya* in mouse to a position closely linked with, but separable from, *Tdy* on the *Sxr* fragment and thus presumably to a position of the normal mouse Y chromosome near the centromere. The human H-Y gene maps between deletion intervals 4B and 7, separate from *TDF* which is on interval 1. We are currently testing cells from a

number of additional patients who have inherited different portions of the Y chromosome to pinpoint the mapping more closely. It is of interest that in mouse a Y-linked gene controlling spermatogenesis (*Spy*) maps near *Hya* on the *Sxr* fragment: they could be the same or closely linked genes. In man, a gene controlling spermatogenesis maps to Yq and the data so far do not exclude that it could be coincident with the H-Y gene.

Key words: H-Y gene, cytotoxic T cell, sex-reversed mice, sex-reversed humans.

---

### Introduction: T cell recognition of H-Y

The male-specific transplantation antigen, H-Y, is controlled by a gene located on the Y chromosome in both humans and mice. H-Y is a member of a family of minor histocompatibility (H) antigens, each characterized by their ability to stimulate certain immune responses of T lymphocytes (Loveland & Simpson, 1986). At one time, the examination of H-Y expression was limited to grafting experiments but since the advent of methods for generating specific cytotoxic and proliferative T cell responses *in vitro* and of maintaining these as cloned lines following the introduction of T cell growth factors, H-Y expression can be tested *in vitro* as well (Simpson, McLaren, Chandler & Tomonari, 1984; Simpson *et al.* 1987). This approach has been particularly useful for examining the H-Y phenotype of individuals from outbred populations who are not so amenable to the grafting approach. One constraint on such *in vitro* testing with H-Y-specific T cells is the need to identify the major histocompatibility complex (MHC: HLA

in man, H-2 in mouse) alleles of the individual to be typed, since the recognition of H-Y, like other minor H antigens, is MHC restricted (Simpson & Gordon, 1977). T cells recognize H-Y only when it is associated with a particular self-MHC allele, so an appropriate panel of H-Y-specific T cells is necessary to H-Y type individuals of different MHC allotypes.

### H-Y expression in sex-reversed mice

H-Y typing of mice is simpler than that of man, because of the ease of preparing H-Y-specific T cells restricted by all of the common H-2 haplotypes, using inbred mouse strains (Simpson, 1982). Female mice of inbred strains of appropriate H-2 type can be selected for immunization with H-2 compatible male cells and from these either *in vitro* bulk cultures of cytotoxic T cells or T cells cloned from these can be prepared for H-Y phenotyping the mice of interest. Examples of the MHC restriction and H-Y specificity of cytotoxic T cells from mixed lymphocyte cultures (MLC) of C57BL/10 (H-2<sup>b</sup>) and C57BL/10 ×

CBA)F<sub>1</sub> (H-2<sup>b/k</sup>) females immunized with (C57BL/10(H-2<sup>b</sup>) and CBA (H-2<sup>k</sup>) male cells, respectively, are given in Table 1 (Simpson, 1982). Table 2 shows the MHC restriction and H-Y specificity of proliferative T cell clones isolated from similar MLC using spleen cells from C57BL/6 (H-2<sup>b</sup>) and C3H (H-2<sup>k</sup>) female mice immunized with syngeneic male cells (Simpson, 1985). H-Y-specific cytotoxic T cells and clones were used to type cells from a panel of mice carrying the sex-reversing mutation *Sxr* (Table 3). These include XX*Sxr* males and T16HX*Sxr* females carrying the T16H, X-autosome translocation, which is invariably active, so that the X*Sxr* of paternal origin is inactive. This permits the female development of these individuals, since *Sxr* is presumably inactive in the majority of cells, at least during gonadogenesis (McLaren & Monk, 1982). The results in Table 3 indicate that each of the XX*Sxr* and XY males were

H-Y positive with the cytotoxic T cells and T cell clones appropriate for their H-2 haplotype. These mice are from a noninbred colony in which H-2<sup>k</sup> and H-2<sup>b</sup> are segregating. Each of the XX females is H-Y negative, whilst of the nine T16HX*Sxr* females, eight are clearly H-Y positive, indicating that in adult life, at least, the gene controlling expression of the H-Y antigen, *Hya*, on *Sxr* is expressed in some spleen cells. The ninth mouse, number 39, was phenotypically H-Y negative: she was subsequently progeny tested (T16H*Sxr* females, unlike XX*Sxr* males, are fertile) and since all of the non-XY progeny inheriting her *Sxr* were H-Y negative, it was clear that a mutation had altered her *Sxr* fragment. This variant is now designated *Sxr'* (McLaren *et al.* 1984). XO*Sxr'* male mice are also H-Y negative when tested by T cells *in vitro* so that XX*Sxr'* and T16HX*Sxr'* mice are not H-Y negative merely because *Sxr'* in them is inactivated

Table 1. H-Y responses in H-2<sup>b</sup> homozygotes and H-2<sup>b/k</sup> heterozygotes

| Responder female          | H-2 |   |     |    | Priming and boosting antigen | Target cell | H-2 |   |     |   | Corrected* % lysis | Restricting specificity for H-Y recognition |
|---------------------------|-----|---|-----|----|------------------------------|-------------|-----|---|-----|---|--------------------|---------------------------------------------|
|                           | K   | A | E   | D  |                              |             | K   | A | E   | D |                    |                                             |
| B10                       | b   | b | (b) | b  | B10♂                         | B10♂        | b   | b | (b) | b | 33.3               | H-2D <sup>b</sup>                           |
|                           |     |   |     |    |                              | B10♀        | b   | b | (b) | b | 2.5                |                                             |
|                           |     |   |     |    |                              | C3H♂        | k   | k | k   | k | 7.3                |                                             |
|                           |     |   |     |    |                              | C3H.SW♂     | b   | b | (b) | b | 38.5               |                                             |
|                           |     |   |     |    |                              | B10.A(2R)♂  | k   | k | k   | b | 30.6               |                                             |
|                           |     |   |     |    |                              | B10.A(2R)♀  | k   | k | k   | b | 2.2                |                                             |
|                           |     |   |     |    |                              | B10.A(5R)♂  | b   | b | b   | d | 3.9                |                                             |
| (B10 × CBA)F <sub>1</sub> | b   | b | (b) | b/ | CBA♂                         | CBA♂        | k   | k | k   | k | 31.1               | H-2D <sup>k</sup>                           |
|                           | k   | k | k   | k  |                              | CBA♀        | k   | k | k   | k | 2.4                |                                             |
|                           |     |   |     |    |                              | B10.A♂      | k   | k | k   | d | 4.6                |                                             |
|                           |     |   |     |    |                              | C3H.OH♂     | d   | d | d   | k | 35.1               |                                             |
|                           |     |   |     |    |                              | B10♂        | b   | b | b   | b | 1.2                |                                             |
|                           |     |   |     |    |                              |             |     |   |     |   |                    |                                             |

\* Per cent specific lysis of target cells at A:T/4:1 as determined from a four-point regression curve

Table 2. Proliferative responses of H-Y-specific T cell clones

| Stimulating cells (KID) | Clone (origin and restriction specificity) |                          |                          |
|-------------------------|--------------------------------------------|--------------------------|--------------------------|
|                         | 2-1-1(B6.A <sup>b</sup> )                  | 10-2(B6.D <sup>b</sup> ) | C-3(C3H.D <sup>k</sup> ) |
| None                    | 199                                        | 541                      |                          |
| C57BL/6♂                | bbb                                        | 26 637                   | 241 455                  |
| C57BL/6♀                | bbb                                        | 389                      | 1 988                    |
| B10.A(5R)♂              | bbd                                        | 31 085                   | 3 558°                   |
| B10.A(4R)♂              | kkb                                        | 219                      |                          |
| B10.A(2R)♂              | kkb                                        |                          | 270 175                  |
| bm12♂                   | bb*b                                       | 177                      | 172 956†                 |
| bm14♂                   | bbb*                                       |                          | 5 025                    |
| CBA♂                    | kkk                                        |                          | 108 970                  |
| CBA♀                    | kkk                                        |                          | 557                      |
| C3H.OH♂                 | ddk                                        |                          | 176 428                  |
| B10.A♂                  | kkd                                        |                          | 648                      |

° Data from a separate experiment in which the stimulation by C57BL/6♂ was 65 434 and medium only was 1575

† From a separate experiment in which addition of C57BL/6♂ gave 287 737 cts min<sup>-1</sup> and medium alone gave 1910 Data from Tomonari (1983).

(Simpson, 1986). XX*Sxr'* and T16HX*Sxr'* mice are also H-Y negative when tested for its presence by transplantation, arguing for the identity of H-Y detected by these two methods, one *in vitro* and one *in vivo*, and for the absence of H-Y antigen from all cells in the body (Simpson *et al.* 1986). *Sxr'* has lost *Hya* or the ability to express this gene, but still causes sex reversal in XX*Sxr'* males, therefore the Y-chromosome-associated testis-determining gene *Tdy* on *Sxr* is clearly separated from *Hya* by this mutation, although the two genes are closely linked on *Sxr* and therefore presumably on the portion of the normal Y chromosome, close to the centromere, where *Tdy* and *Hya* are normally located (Simpson, 1986). Another mutation which provides evidence for the linkage of *Tdy* and *Hya* is Y\* described by Eicher & Washburn (1986). Y\* is apparently a rearranged Y chromosome in which the pairing region is located close to the centromere: amongst the sperm generated by carrier males is an X<sup>Y</sup>, bearing a paternal X to which the greater part of the Y is attached. The XX<sup>Y</sup> mice created by the fertilization of a normal X-bearing ovum with such a sperm are H-Y positive and phenotypically male, with aspermatogenic testes (like XX*Sxr*: Simpson *et al.* 1983).

### H-Y expressed in sex-reversed humans

The investigation of the position of the human H-Y gene on the Y chromosome has produced findings which are in parallel with those of mice, since they clearly separate the testis-determining factor, *TDF*, from the H-Y gene, but in man the linkage between these two genes, unlike mouse, is not at all close (Simpson *et al.* 1987).

H-Y typing in man is possible because of the isolation of T cell clones specific for H-Y from transfused spontaneously recovered female aplastic anaemia patients (Goulmy, 1985). Clones currently available are either HLA-A2 or HLA-B7 restricted, so this limits our ability to type cells from individuals carrying one or both of these alleles; fortunately, this includes more than 50% of the population. For the localization of the H-Y gene in man, potentially informative patients are those who have inherited a partly deleted paternal Y chromosome or a translocated Y chromosome fragment. Such patients are in two phenotypic categories: XX males and XY females. The six males described here have inherited variable portions of Yp whilst the two females possess Yq and a variable portion of the Yp. Table 4 shows the results of HLA and H-Y typing lymphoblastoid B

**Table 3.** H-Y typing by CML and proliferation of H-Y specific-clones of normal mice and of mice of both sex phenotypes carrying *Sxr*

| Cells added from mouse | Proliferation of H-Y specific clone (restriction specificity) |                       |                      | CML typing with       |                       | H-2* type | H-Y† type |
|------------------------|---------------------------------------------------------------|-----------------------|----------------------|-----------------------|-----------------------|-----------|-----------|
|                        | C-3(D <sup>a</sup> )                                          | 10-2(D <sup>b</sup> ) | 2-1(A <sup>b</sup> ) | anti-H-Y <sup>k</sup> | anti-H-Y <sup>b</sup> |           |           |
| None                   | 1016                                                          | 301                   | 765                  |                       |                       |           |           |
| 30 XX♀                 | 2174                                                          | 1078                  | 197                  | 0.9                   | 1.1                   | k         | -         |
| 32                     | 929                                                           | 1312                  | 489                  | -1.2                  | 2.0                   | k         | -         |
| 33                     | 1487                                                          | 552                   | 245                  | -14.4                 | -7.7                  | k         | -         |
| 34                     | 591                                                           | 649                   | 3932                 | 3.0                   | 1.7                   | k         | -         |
| 4 T16HX <i>Sxr</i> ♀   | 26406                                                         | 651                   | 3252                 | 20.0                  | 8.5                   | k         | +         |
| 13                     | 58269                                                         | 379                   | 3086                 | 30.6                  | 6.4                   | k         | +         |
| 35                     | 66208                                                         | 828                   | 518                  | 26.4                  | 8.4                   | k         | +         |
| 36                     | 42014                                                         | 1531                  | 2526                 | 23.0                  | -1.1                  | k         | +         |
| 37                     | 46783                                                         | 586                   | 2053                 | 23.3                  | 5.8                   | k         | +         |
| 38                     | 64640                                                         | 1255                  | 1160                 | 29.4                  | 2.0                   | k         | +         |
| 39                     | 1904                                                          | 1648                  | 1685                 | 1.3                   | 1.9                   | k         | -         |
| 40                     | 61249                                                         | 1613                  | 4149                 | 25.2                  | 3.1                   | k         | +         |
| 41                     | 47145                                                         | 778                   | 7653                 | 25.8                  | 6.2                   | k         | +         |
| 42 XX <i>Sxr</i> ♂     | 82529                                                         | 1229                  | 704                  | ND                    | ND                    | k         | +         |
| 43                     | 40797                                                         | 341                   | 225                  | ND                    | ND                    | k         | +         |
| 47                     | 899                                                           | 22400                 | ND                   | -0.7                  | 12.4                  | b         | +         |
| 31 XY♂                 | 549                                                           | 32610                 | 30472                | -3.7                  | 29.4                  | b         | +         |
| 45                     | 3178                                                          | 1451                  | 579                  | 29.3                  | 2.7                   | k         | +         |
| 46                     | 12092                                                         | 635                   | 30                   | 16.9                  | -1.1                  | k         | +         |

For method of proliferation see legend for Table 2.

CML: % cytotoxicity at A:T/10:1 from 12-point regression analysis.

\* H-2 type established with allospecific cytotoxic T cells.

† Summary of H-Y typing with H-Y specific cytotoxic T cells and H-Y-specific proliferative clones.

cell lines from these patients and appropriate A2- and B7-positive normal male and female controls, with cytotoxic T cells. It is important to confirm serological HLA typing with T cells, since variants of A2 and B7 exist which are not distinguishable serologically but which cannot be recognized by allospecific or MHC-restricted T cells (Horai, von der Poel & Goulmy, 1982). A negative H-Y typing can thus only be interpreted as such in face of a positive allotyping for the restriction element with T cells (A2 or B7 in the case of individuals shown in Table 4).

The deletion map shown in Fig. 1 is based on Vergnaud *et al.* (1986), Disteche *et al.* (1986) and Page (1986) and includes the summarized H-Y results of Table 4 as well as unpublished data on class 1 XX males. Since six class 3 males were H-Y negative it is clear that the gene for H-Y does not map to deletion interval 1-3 on Yp (*TDF* is in interval 1, see also Affara *et al.* 1986). Likewise the gene for H-Y is

excluded from interval 4A, since the class 2 XY female is H-Y positive and lacks this portion of Yp. The H-Y gene thus maps between intervals 4B and 7, far from *TDF* in interval 1.

**Conclusion**

In summary, these data, using cytotoxic and proliferative T cell clones specific for H-Y and restricted by MHC molecules to type mice and humans inheriting incomplete portions of the Y chromosome, have allowed us to map the H-Y antigen gene *Hya* in mouse to a position closely linked with, but separable from, *Tdy* on the *Sxr* fragment and thus presumably to a portion of the normal mouse Y chromosome near the centromere. The human H-Y gene maps between deletion intervals 4B and 7, separate from *TDF* which is on interval 1. We are currently testing cells from a

**Table 4.** HLA and H-Y typing of B cell lines from XX males, XY females and normal controls

| Exp. | Karyotype/<br>sex | Individual       | HLA*<br>serology |       |       |           | H-Y<br>phenotype |
|------|-------------------|------------------|------------------|-------|-------|-----------|------------------|
|      |                   |                  | A                | B     | αA-2† | αH-Y/A-2† |                  |
| 1    | XX♂               | RH               | 2.3              | 21.40 | 18    | 9         | -                |
|      | XX♂               | JT               | 2                | 44.45 | 24    | 3         | -                |
|      | XX♂               | LGL 105          | 2.3              | 35.44 | 13    | 4         | -                |
|      | XY♂               | Normal male      | 1.2              | 8     | 20    | 38        | +                |
|      | XX♀               | Normal female    | 2.11             | 8.44  | 17    | 8         | -                |
| 2    | XX♂               | WB               | 2.9              | 17.18 | 37    | 0         | -                |
|      | XY♂               | Normal male      | 1.2              | 8     | 25    | 17        | +                |
|      | XX♀               | Normal female    | 2.11             | 8.44  | 17    | 3         | -                |
| 3    | XX♂               | WHT 950          | 1.3              | 7     | 76    | 9         | -                |
|      | XX♂               | JM               | 3.28             | 7     | 62    | 1         | -                |
|      | XY♂               | Normal male      | 9                | 7.44  | ND    | 40        | +                |
|      | XX♀               | Normal female    | 3.24             | 7     | 54    | 0         | -                |
| 4    | XY♀               | WHT1003 (case 1) | 3                | 7.13  | 55    | 70        | +                |
|      | XY♀               | WHT 715 (case 2) | 3                | 7     | 57    | 69        | +                |
|      | XY♂               | Father of case 2 | 28.3             | 7.40  | 52    | 61        | +                |
|      | XX♀               | Mother of case 2 | 29               | 7     | 36    | 6         | -                |

\* HLA serology performed by Lorna Kennedy at ICRF, Lincoln's Inn Fields or Donald Palmer of Dept Immunology, RPMS  
 † Per cent specific lysis of target cells at A:T/10:1 as determined from a 6-point regression curve.  
 Modified from table 1, Simpson *et al.* 1987

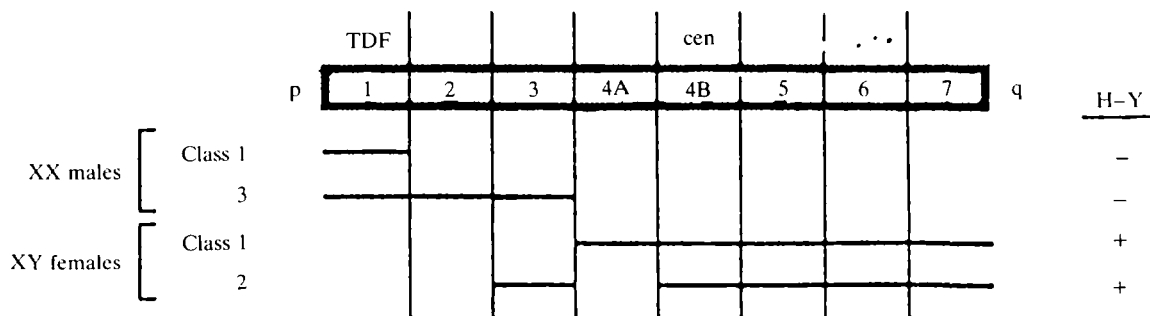

**Fig. 1.** 8-interval deletion map of the human Y chromosome (based on Page, 1986).

number of additional patients who have inherited different portions of the Y chromosome to pinpoint the mapping more closely. It is of interest that in mouse a Y-linked gene, *Spy*, controlling spermatogenesis maps near *Hya* (Burgoyne, Levy & McLaren, 1986; for discussion see Burgoyne, this symposium) on the *Sxr* fragment: they could be the same or closely linked genes. In man, a gene controlling spermatogenesis maps to Yq (Tieopolo & Zuffardi, 1976), and the data so far do not exclude the possibility that it could be coincident with the H-Y gene.

## References

- AFFARA, N. A., FERGUSON-SMITH, M. A., TOLMIE, J., KWOK, K., MITCHELL, M., JAMIESON, D., COOKE, A. & FLORENTIN, L. (1986). Variable transfer of Y-specific sequences in XX males. *Nucleic Acids Res.* **14**, 5375–5387.
- BURGOYNE, P., LEVY, E. & MCLAREN, A. (1986). Spermatogenic failure in male mice lacking H-Y antigen. *Nature, Lond.* **320**, 170–172.
- DISTECHE, C. M., CASANOVA, M., SAAL, H., FRIEDMAN, C., SYBERT, V., GRAHAM, J., THULINE, H., PAGE, D. C. & FELLOUS, M. (1986). Small deletions of the short arm of the Y chromosome in 46,XY females. *Proc. natn. Acad. Sci. U.S.A.* **83**, 7841–7844.
- EICHER, E. M. & WASHBURN, L. L. (1986). Genetic control of primary determination in mice. *A. Rev. Genet.* **20**, 327–360.
- GOULMY, E. (1985). Class-restriction human cytotoxic T lymphocytes directed against minor transplantation antigens and their possible role in organ transplantation. *Progress in Allergy* **36**, 44–72.
- HORAI, S., VAN DER POEL, J. J. & GOULMY, E. (1982). Differential recognition of the serologically defined HLA-A2 antigen by allogeneic cytotoxic T cells. *Immunogenetics* **16**, 135–142.
- LOVELAND, B. & SIMPSON, E. (1986). The non-MHC transplantation antigens: neither weak nor minor. *Immunology Today* **7**, 223–229.
- MCLAREN, A. & MONK, M. (1982). Fertile females produced by inactivation from X chromosome of 'sex-reversed' mice. *Nature, Lond.* **300**, 446–448.
- MCLAREN, A., SIMPSON, E., TOMONORI, K., CHANDLER, P. & HOGG, H. (1984). Male sexual differentiation in mice lacking H-Y antigen. *Nature, Lond.* **312**, 552–555.
- PAGE, D. C. (1986). Sex reversal: deletion mapping the male-determining function of the human Y chromosome. *Cold Spring Harbor Symp. quant. Biol.* **51**, 229–235.
- SIMPSON, E. (1982). The role of H-Y as a minor transplantation antigen. *Immunology Today* **3**, 97–106.
- SIMPSON, E. (1985). Recognition of minor transplantation antigens: the role of H-2 and other Ir genes. In *Major Histocompatibility System: the Gorer Symposium* (ed. P. B. Medawar & T. Lehner), pp. 37–55. Oxford: Blackwell.
- SIMPSON, E. (1986). The H-Y antigen and sex reversal. *Cell* **44**, 813–814.
- SIMPSON, E., CHANDLER, P., GOULMY, E., DISTECHE, C. M., FERGUSON-SMITH, M. A. & PAGE, D. C. (1987). Separation of the genetic loci for the H-Y antigen and for testis determination on human Y chromosome. *Nature, Lond.* **326**, 876–878.
- SIMPSON, E., CHANDLER, P., HUNT, R., HOGG, H., TOMONARI, K. & MCLAREN, A. (1986). H-Y status of X/XSxr' male mice: *in vivo* tests. *Immunology* **57**, 345–349.
- SIMPSON, E., CHANDLER, P., WASHBURN, L. L., BUNKER, H. P. & EICHER, E. M. (1983). H-Y typing of karyotypically abnormal mice. *Differentiation* **23 Suppl.**, S116–120.
- SIMPSON, E. & GORDON, R. D. (1987). Responsiveness to H-Y antigen Ir gene complementation and target cell specificity. *Immunol. Rev.* **35**, 59–75.
- SIMPSON, E., MCLAREN, A., CHANDLER, P. & TOMONARI, K. (1984). Expression of H-Y antigen by female mice carrying *Sxr*. *Translocation* **37**, 17–21.
- TIEOPOLO, L. & ZUFFARDI, O. (1976). Localization of factors controlling spermatogenesis in the non-fluorescent portion of the human Y chromosome long arm. *Human Genet.* **34**, 119–124.
- TOMARI, K. (1983). Antigen and MHC restriction specificity of two types of cloned male-specific T cell lines. *J. Immunol.* **131**, 1641–1645.
- VERGNAUD, G., PAGE, D. C., SIMMLER, M. C., BROWN, L., ROUYER, F., NOEL, B., BOTSTEIN, D., DE LA CHAPPELLE, A. & WEISSENBACH, J. (1986). A deletion map of the human Y chromosome based on DNA hybridization. *A. J. Hum. Genet.* **38**, 109–124.
